# Supplementary material for: Milk Composition of Asian Elephants (Elephas maximus) in a Natural Environment in Myanmar during Late Lactation
Source: Animals (Basel). 2020 Apr 22;10(4):725. doi: 10.3390/ani10040725 (PMC7222762; doi:10.3390/ani10040725)
Supplement: Supplementary file 1 [file animals-10-00725-s001.pdf]

## Supplementary tables

Table S1. GLM model of the effects of female and calf variables on protein composition in milk samples (n=36). Reference categories are given in brackets and estimates for the other category.

$R^2=0.32$

| Term                                   | Parameter estimate $\pm$<br>S.E | F     | Df | <i>P</i> value |
|----------------------------------------|---------------------------------|-------|----|----------------|
| Lactation month (Calf age)             | $0.407 \pm 0.127$               | 10.31 | 1  | 0.003          |
| Season (Wet)                           | $-2.809 \pm 0.837$              | 11.27 | 1  | 0.002          |
| Mother's size (Smaller)                | $-1.590 \pm 0.676$              | 5.53  | 1  | 0.025          |
| Calf birth-order (Later-born<br>(4,5)) | $2.824 \pm 1.245$               | 5.15  | 1  | 0.031          |
| Calf sex (Male)                        | $3.460 \pm 1.603$               | 4.66  | 1  | 0.039          |
| Mother's origin (Wild)                 | $0.569 \pm 0.615$               | 0.95  | 1  | 0.337          |
| Maternal age at calf birth             | $0.014 \pm 0.124$               | 0.01  | 1  | 0.913          |

Terms retained in the final model are shown above the dashed line.

Table S2. GLM model of the effects of female and calf variables on solids composition in milk samples (n=36). Reference categories are given in brackets and estimates are given for the other category.  $R^2=0.23$

| Term                                   | Parameter estimate $\pm$<br>S.E | F    | Df | <i>P</i> value |
|----------------------------------------|---------------------------------|------|----|----------------|
| Lactation month (Calf age)             | 0.484 $\pm$ 0.189               | 6.50 | 1  | 0.016          |
| Maternal age at calf birth             | 0.454 $\pm$ 0.176               | 6.64 | 1  | 0.015          |
| Mother's origin (Wild)                 | 3.247 $\pm$ 1.404               | 5.35 | 1  | 0.028          |
| Calf birth-order (Later-born<br>(4,5)) | 3.282 $\pm$ 1.503               | 4.77 | 1  | 0.037          |
| Season (Wet)                           | -3.379 $\pm$ 2.494              | 1.84 | 1  | 0.186          |
| Mother's size (Smaller)                | -0.941 $\pm$ 1.591              | 0.35 | 1  | 0.558          |
| Calf sex (Male)                        | 0.807 $\pm$ 3.221               | 0.06 | 1  | 0.804          |

Terms retained in the final model are shown above the dashed line.

Table S3. GLMM model of the effects of female and calf variables on water composition in milk samples (n=36). Reference categories are given in brackets and estimates for the other category.

$R^2=0.23$

| Term                                | Parameter estimate $\pm$ S.E | F    | Df | P value |
|-------------------------------------|------------------------------|------|----|---------|
| Lactation month (Calf age)          | -0.484 $\pm$ 0.190           | 6.50 | 1  | 0.016   |
| Maternal age at calf birth          | -0.454 $\pm$ 0.176           | 6.64 | 1  | 0.015   |
| Mother's origin (Wild)              | -3.247 $\pm$ 1.404           | 5.35 | 1  | 0.028   |
| Calf birth-order (Later-born (4,5)) | -3.282 $\pm$ 1.503           | 4.77 | 1  | 0.037   |
| Season (Wet)                        | 3.379 $\pm$ 2.494            | 1.84 | 1  | 0.186   |
| Mother's size (Smaller)             | 1.341 $\pm$ 1.771            | 0.57 | 1  | 0.455   |
| Calf sex (Male)                     | -0.807 $\pm$ 3.221           | 0.06 | 1  | 0.804   |

Terms retained in the final model are shown above the dashed line.

Table S4. GLM model of the effects of female and calf variables on fat composition in milk samples (n=35). Reference categories are given in brackets and estimates for the other category.

$R^2=0.066$

| Term                                   | Parameter estimate $\pm$<br>S.E | F    | Df | <i>P</i> value |
|----------------------------------------|---------------------------------|------|----|----------------|
| Lactation month (Calf age)             | -0.181 $\pm$ 0.119              | 2.32 | 1  | 0.138          |
| Calf birth-order (Later-born<br>(4,5)) | 1.237 $\pm$ 1.287               | 0.92 | 1  | 0.344          |
| Maternal age at calf birth             | -0.113 $\pm$ 0.139              | 0.66 | 1  | 0.423          |
| Calf sex (Male)                        | -1.043 $\pm$ 1.627              | 0.41 | 1  | 0.526          |
| Season (Wet)                           | 0.819 $\pm$ 1.467               | 0.31 | 1  | 0.581          |
| Mother's origin (Wild)                 | -0.595 $\pm$ 1.401              | 0.18 | 1  | 0.674          |
| Mother's size (Smaller)                | -0.274 $\pm$ 1.584              | 0.03 | 1  | 0.864          |

Terms retained in the final model are shown above the dashed line.

Table S5. GLM model of the effects of female and calf variables on ash composition in milk samples (n=36). Reference categories are given in brackets and estimates for the other category for two level variables.  $R^2=0.42$

| Term                                   | Parameter estimate $\pm$<br>S.E | F     | Df | <i>P</i> value |
|----------------------------------------|---------------------------------|-------|----|----------------|
| Lactation month (Calf age)             | -0.0065 $\pm$ 0.006             | 1.16  | 1  | 0.289          |
| Maternal age at calf birth             | -0.0229 $\pm$ 0.005             | 17.33 | 1  | 0.0002         |
| Mother's origin (Wild)                 | -0.120 $\pm$ 0.051              | 5.41  | 1  | 0.027          |
| Mother's size (Smaller)                | -0.122 $\pm$ 0.058              | 4.39  | 1  | 0.044          |
| Calf sex (Male)                        | 0.146 $\pm$ 0.091               | 2.58  | 1  | 0.128          |
| Calf birth-order (Later-born<br>(4,5)) | -0.080 $\pm$ 0.060              | 1.81  | 1  | 0.189          |
| Season (Wet)                           | -0.009 $\pm$ 0.066              | 0.02  | 1  | 0.892          |

Terms retained in the final model are shown above the dashed line.

Table S6. GLMM model of the effects of female and calf variables on vitamin E composition in milk samples (n=36). Reference categories are given in brackets and estimates for the other category.

| Term                                   | Parameter estimate $\pm$<br>S.E | F    | NumDf | DenDf | <i>P</i><br>value |
|----------------------------------------|---------------------------------|------|-------|-------|-------------------|
| Lactation month (Calf age)             | 0.0023 $\pm$ 0.002              | 1.16 | 1     | 33    | 0.289             |
| Calf birth-order (Later-born<br>(4,5)) | -0.048 $\pm$ 0.024              | 4.16 | 1     | 33    | 0.049             |
| Maternal age at calf birth             | -0.0039 $\pm$ 0.0031            | 1.59 | 1     | 32    | 0.216             |
| Mother's origin (Wild)                 | 0.026 $\pm$ 0.025               | 1.12 | 1     | 32    | 0.298             |
| Mother's size (Smaller)                | 0.0196 $\pm$ 0.0285             | 0.47 | 1     | 32    | 0.50              |
| Calf sex (Male)                        | -0.027 $\pm$ 0.054              | 0.25 | 1     | 32    | 0.62              |
| Season (Wet)                           | -0.0096 $\pm$ 0.0271            | 0.13 | 1     | 32    | 0.72              |

Terms retained in the final model are shown above the dashed line.
